# Supplementary material
Source: publisher site journal article supplement (https://e-cmh.org/upload/media/cmh-2023-0110-Supplementary-Table-9.pdf)
Supplement: Supplementary file 1 [file cmh-2023-0110-Supplementary-Table-9.pdf]

**Supplementary Table 9.** Treatment rate of hepatitis C according to age, sex, and year

| Age      | 2018  |      |        | 2019  |      |        | 2020  |      |        | Average<br>(2018–2020) |
|----------|-------|------|--------|-------|------|--------|-------|------|--------|------------------------|
|          | Total | Male | Female | Total | Male | Female | Total | Male | Female |                        |
| 10–19    | 47.6  | 43.8 | 60.0   | 42.9  | 57.1 | 28.6   | 41.2  | 45.5 | 33.3   | 43.9                   |
| 20–29    | 66.3  | 73.3 | 62.9   | 60.6  | 58.1 | 62.5   | 62.7  | 48.6 | 73.9   | 63.2                   |
| 30–39    | 58.5  | 62.2 | 55.9   | 60.3  | 57.9 | 62.1   | 58.4  | 59.3 | 57.4   | 59.1                   |
| 40–49    | 63.2  | 60.7 | 66.6   | 67.5  | 64.6 | 71.4   | 63.1  | 59.9 | 66.8   | 64.6                   |
| 50–59    | 67.7  | 61.9 | 74.4   | 71.2  | 65.8 | 78.2   | 61.3  | 56.3 | 68.4   | 66.7                   |
| 60–69    | 61.7  | 56.7 | 66.1   | 67.4  | 59.9 | 74.7   | 57.7  | 52.4 | 62.8   | 62.3                   |
| 70–79    | 49.4  | 44.4 | 52.6   | 52.7  | 46.9 | 56.3   | 44.4  | 41.0 | 46.3   | 48.8                   |
| 80+      | 17.4  | 17.0 | 17.7   | 21.5  | 23.6 | 20.6   | 21.1  | 20.4 | 21.4   | 20.0                   |
| Subtotal | 57.0  | 55.1 | 58.7   | 60.8  | 58.7 | 62.8   | 53.6  | 51.7 | 55.4   | 57.1                   |

All data were expressed as percentages.
